# Supplementary material for: 5-Hydroxymethylcytosine signatures in circulating cell-free DNA as diagnostic and predictive biomarkers for coronary artery disease
Source: PubMed Central journal article supplement (PMC6974971; doi:10.1186/s13148-020-0810-2), 2020-01-21

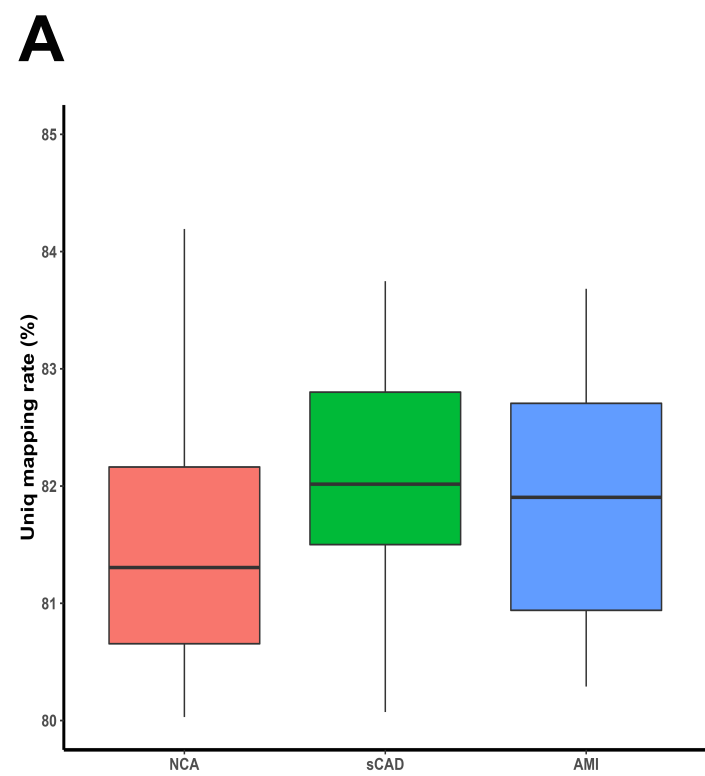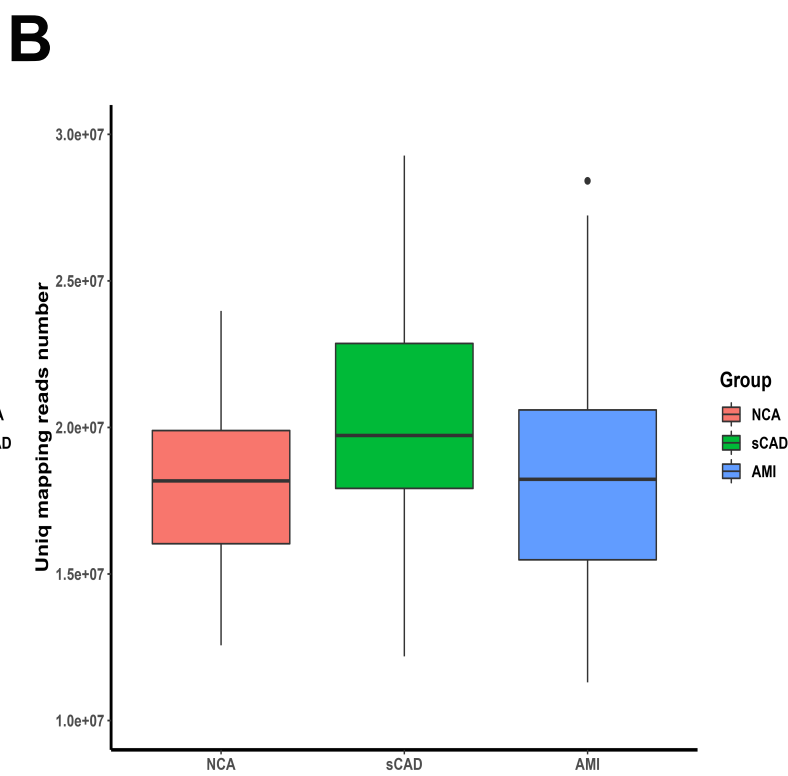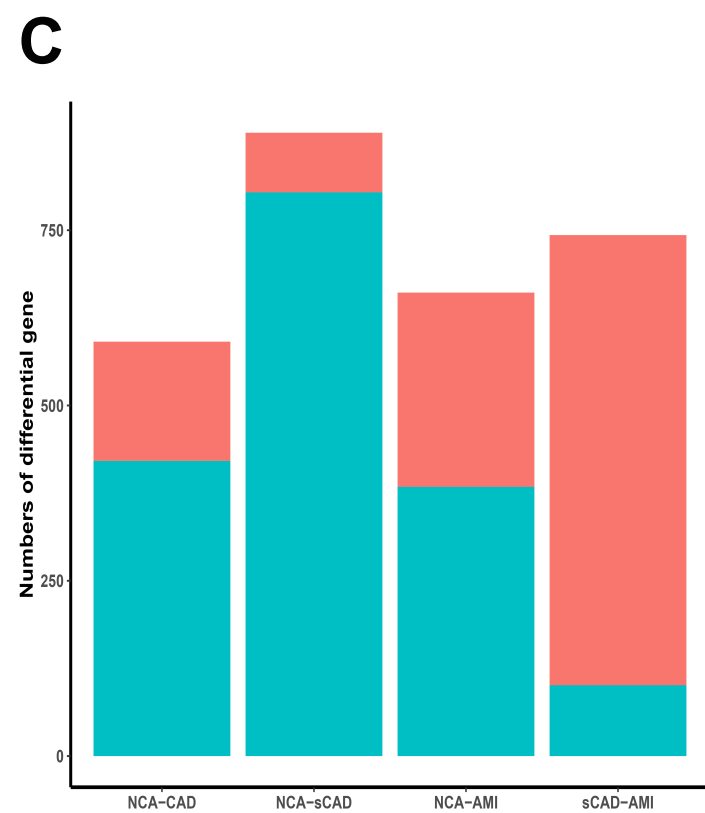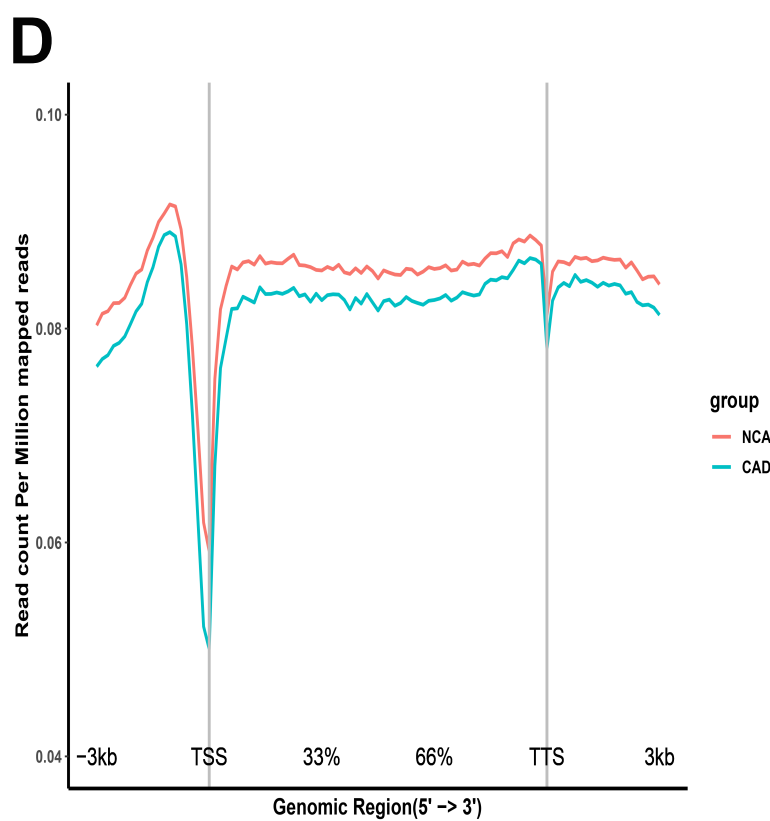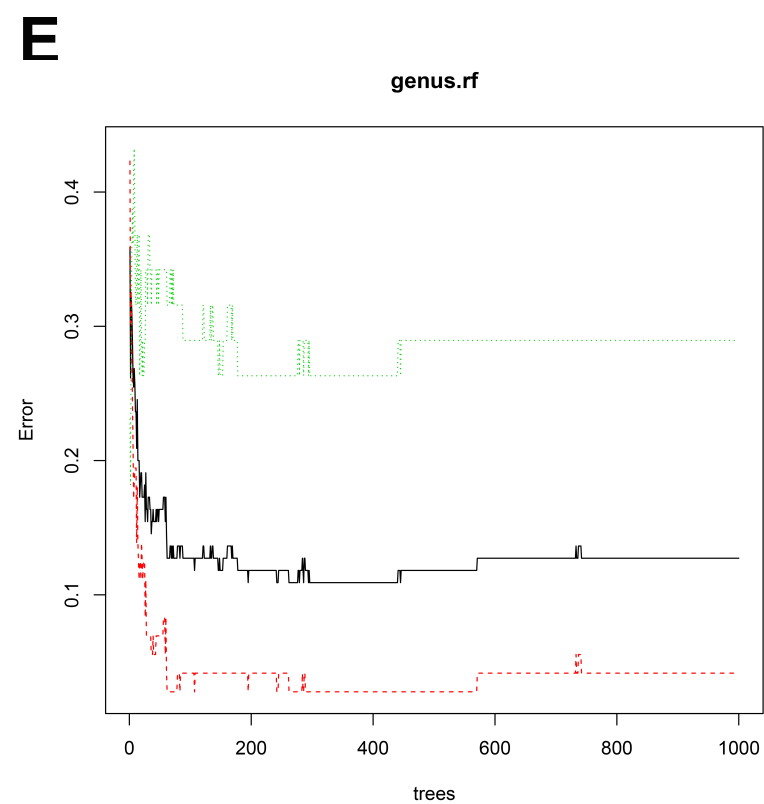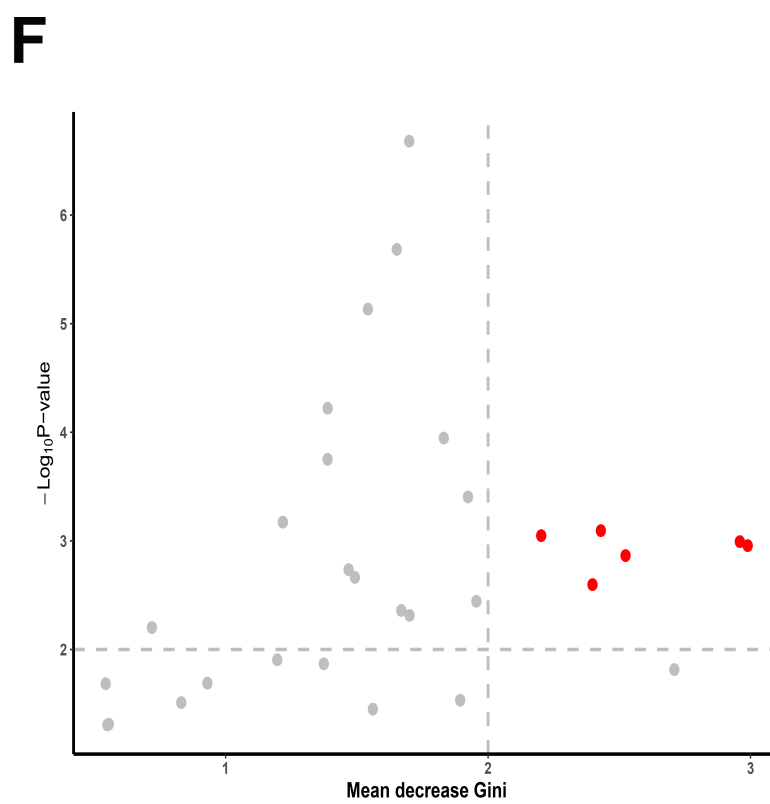

Supplement: 13148_2020_810_MOESM2_ESM.pdf [file 13148_2020_810_MOESM2_ESM.pdf]
