# Supplementary material for: 5-Hydroxymethylcytosine signatures in circulating cell-free DNA as diagnostic and predictive biomarkers for coronary artery disease
Source: PubMed Central journal article supplement (PMC6974971; doi:10.1186/s13148-020-0810-2), 2020-01-21

**A****genus.rf**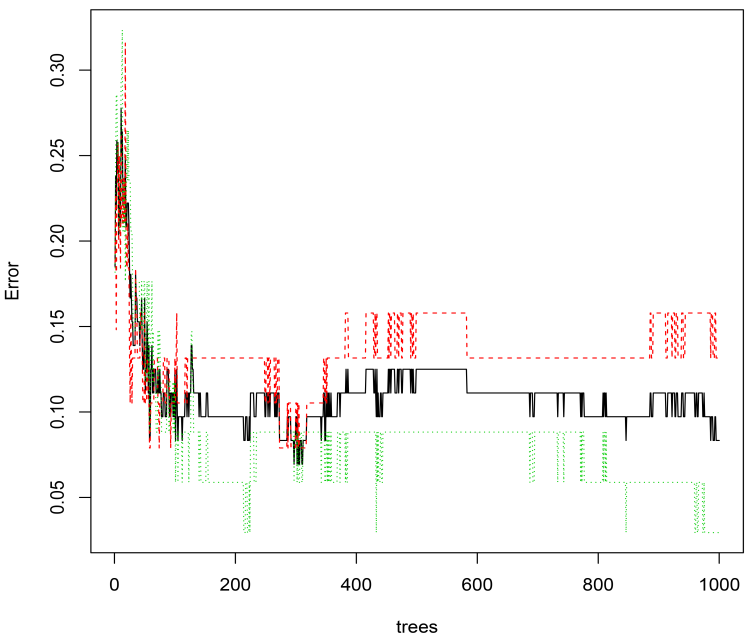**B**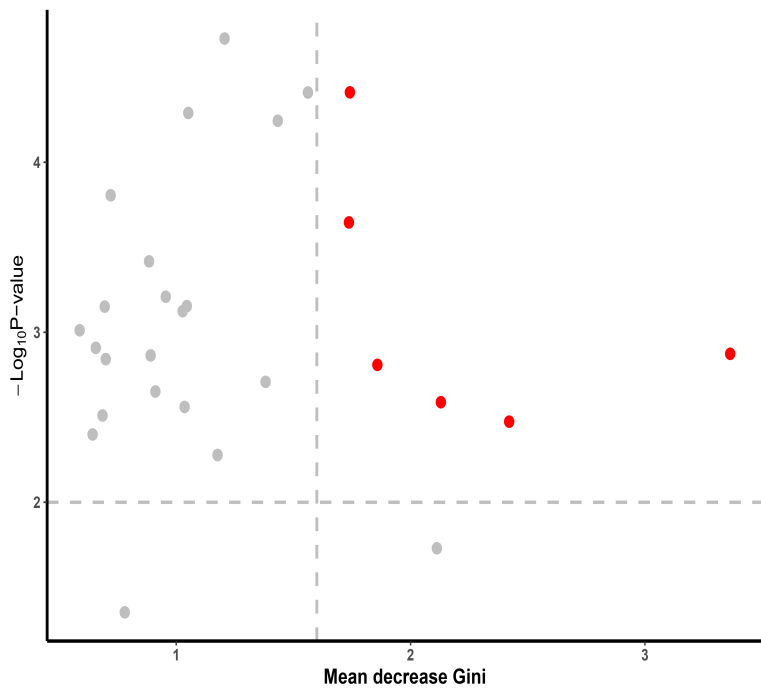**C**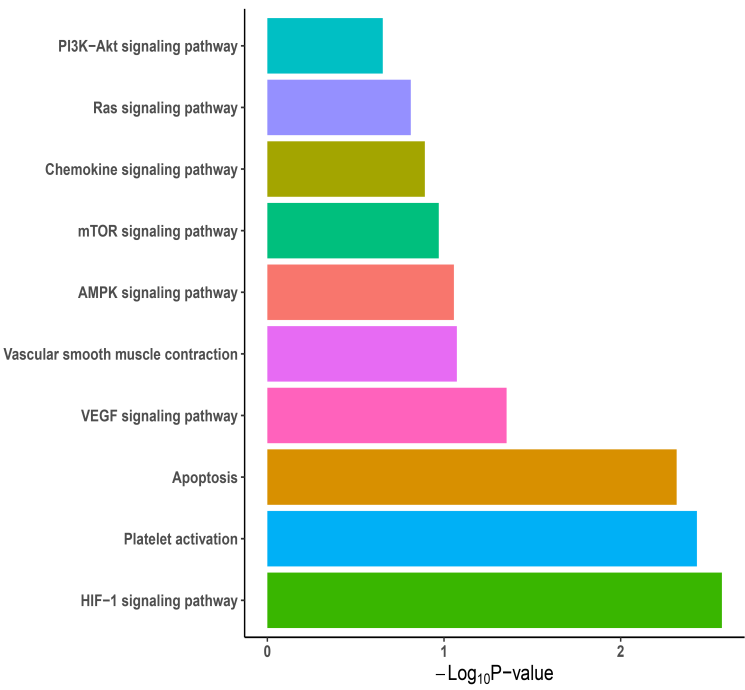**D**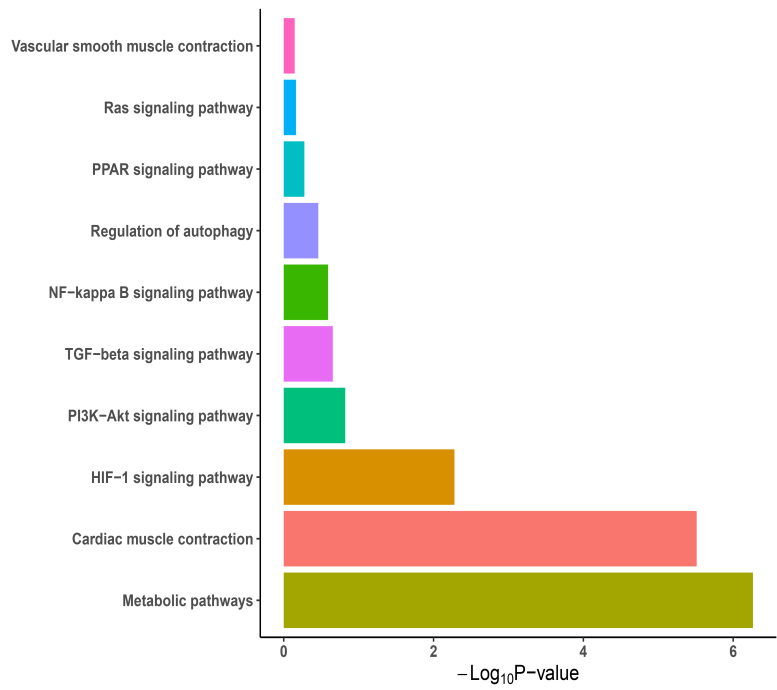

Supplement: 13148_2020_810_MOESM3_ESM.pdf [file 13148_2020_810_MOESM3_ESM.pdf]
